# Supplementary material for: A cancer rainbow mouse for visualizing the functional genomics of oncogenic clonal expansion
Source: PubMed Central journal article supplement (PMC6889384; doi:10.1038/s41467-019-13330-y), 2019-12-02
Supplement: 41467_2019_13330_MOESM3_ESM.pdf [file 41467_2019_13330_MOESM3_ESM.pdf]

## Description of Additional Supplementary Files

File Name: Supplementary Data 1

Description: NCAT ROSA-targeting plasmid. Annotated sequence provided in GenBank file format.

File Name: Supplementary Data 2

Description: MCAT ROSA-targeting plasmid. Annotated sequence provided in GenBank file format.

File Name: Supplementary Data 3

Description: ROBO ROSA-targeting plasmid. Annotated sequence provided in GenBank file format.

File Name: Supplementary Data 4

Description: scRNAseq DIGE analysis. Differentially expressed genes ( $p < 0.01$ ) were assessed between WT and ROBO cell-types.
